# Supplementary material
Source: Research Square preprint supplement (doi:10.21203/rs.3.rs-9177140/v1)
Supplement: Supplementary file 1 [file 96d3c10b95ee3d113eb7669f.docx]

**Light-dependent reversible biofilm formation in the model cyanobacterium *Synechocystis* sp*.* PCC 6803**

**Supplementary information**

**Fiji – Image J macro code**

// Synechocystis Cell Size and Shape Analyzer

// --- Parameters ---

minSize = 3 ; // Minimum cell size (µm2)

maxSize =3000 ; // Maximum cell size (µm2)

// --- Start ---

run("8-bit");

run("Set Measurements...", "area mean min centroid center perimeter bounding fit shape feret's add redirect=None decimal=3");

// Threshold & binarize

setOption("BlackBackground", false);

run("Convert to Mask");

// Optional: Fill holes and separate touching cells

run("Fill Holes");

run("Watershed");

// Analyze particles

run("Analyze Particles...", "size="+minSize+"-"+maxSize+" show=Outlines display exclude clear");

// Save results

saveAs("Results", getDirectory("current") + "Synechocystis_Cell_Measurements.csv");

References:

ImageJ user guide: <https://imagej.net/imaging/particle-analysis>


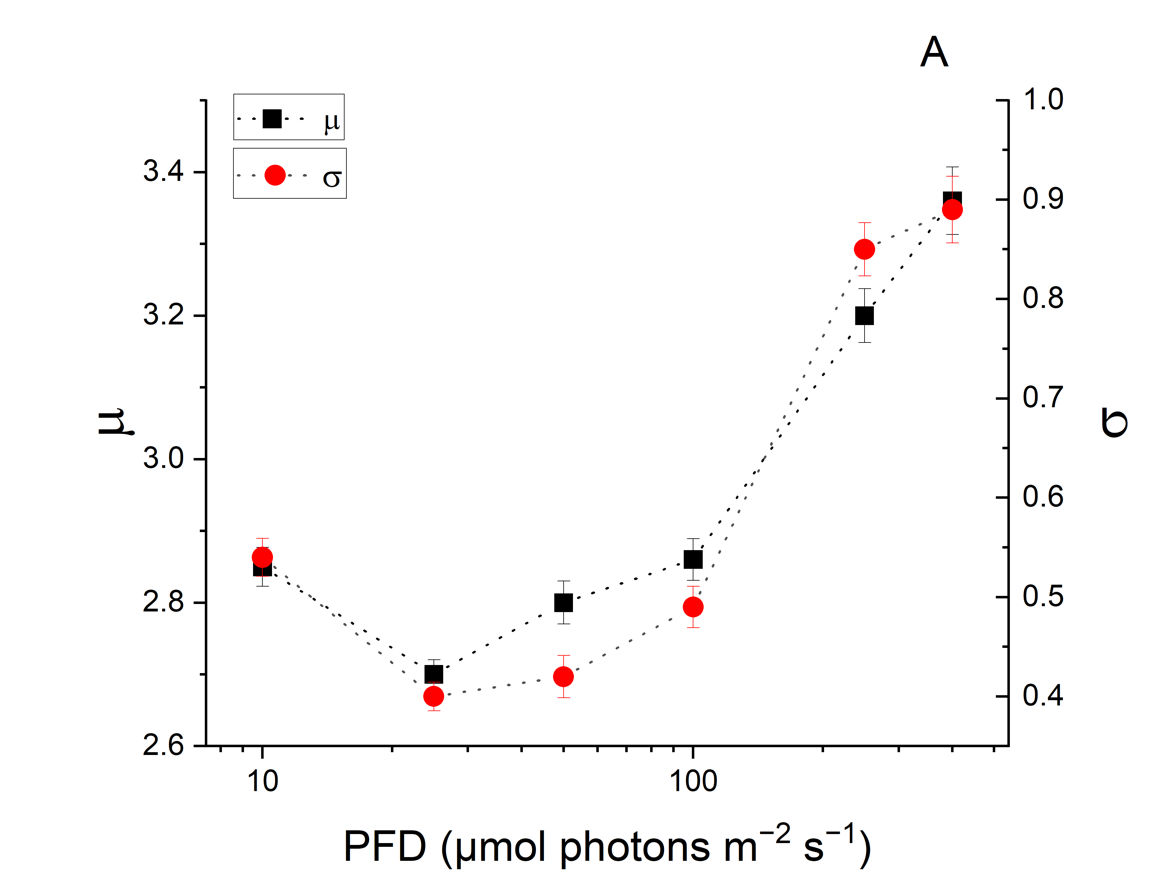


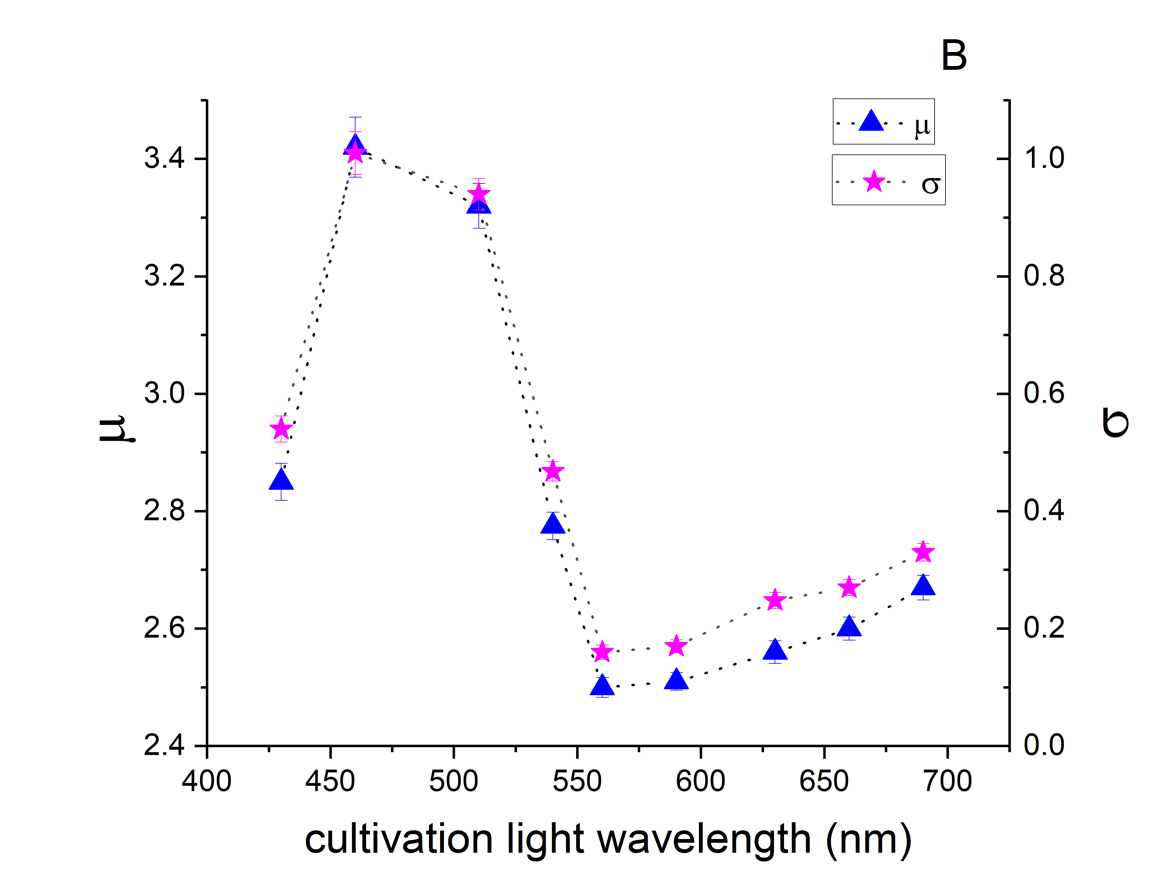


**Supplementary Figure 1.** Log-normal scale (μ) and shape (σ) parameters as a function of PFD and monochromatic cultivation wavelength. μ reflects the central tendency of aggregate size, while σ describes distribution breadth and heterogeneity. In all analyses, small objects (<10 µm²; single cells and early 3–5-cell microcolonies) were excluded. Per treatment, 1000–3000 raw objects were initially detected, yielding 200–600 aggregates suitable for log-normal modeling. Percentile trimming (lower 95%) were used to exclude merged aggregates.
